# Supplementary material for: MiR-23a sensitizes nasopharyngeal carcinoma to irradiation by targeting IL-8/Stat3 pathway
Source: PubMed Central journal article supplement (PMC4695064; doi:10.18632/oncotarget.5117), 2015-06-07
Supplement: oncotarget-06-28341-s001.pdf [file oncotarget-06-28341-s001.pdf]

# MiR-23a sensitizes nasopharyngeal carcinoma to irradiation by targeting IL-8/Stat3 pathway

## Supplementary Material

| No.        | Vector Name                      | Length | Target Sequence       | Chosen |
|------------|----------------------------------|--------|-----------------------|--------|
| IL8 shRNA1 | HSH009678-5-LVRU6GP(CS9OS397270) | 21     | gcactccataaggcacaact  | ✓      |
| IL8 shRNA2 | HSH009678-6-LVRU6GP(CS9OS397271) | 21     | gcataaagacatactccaaac | ✓      |
| IL8 shRNA3 | HSH009678-7-LVRU6GP(CS9OS397272) | 21     | gcacgggagaatatacaata  |        |
| IL8 shRNA4 | HSH009678-8-LVRU6GP(CS9OS397273) | 21     | ggatccacaagtcttgttcc  |        |

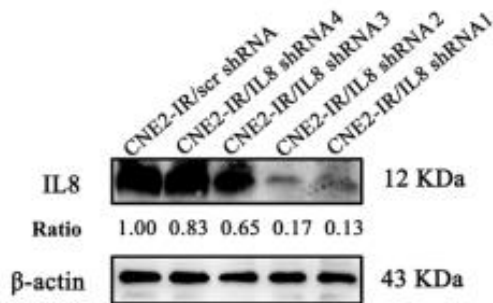

**Supplementary Figure S1.** The targets for human IL-8 shRNA vector and their efficacy of IL-8 knockdown. (top) the targets for human IL-8 shRNA; (bottom) a representative result of Western blotting shows that the expression levels of IL-8 in the CNE2-IR cells transiently transfected with the psi-LVRU6GP-IL-8 shRNA vector expressing IL-8 shRNA1, shRNA2, shRNA3 or shRNA4. Knockdown efficacy of IL-8 shRNA1 and shRNA2 was better than that of the other two IL-8 shRNAs, thus IL-8 shRNA1 and shRNA2 vectors were selected for establishing stably transfected CNE2-IR cell lines.

**Supplementary Table S1.** The clinicopathological parameters of 111 patients with nasopharyngeal carcinoma

| <b>Variable</b>                  | <b>No. of patients</b> | <b>%</b> |
|----------------------------------|------------------------|----------|
| <b>Gender</b>                    |                        |          |
| Male                             | 88                     | 79.28    |
| Female                           | 23                     | 20.72    |
| <b>Age</b>                       |                        |          |
| ≥46                              | 52                     | 46.85    |
| <46                              | 59                     | 53.15    |
| <b>Primary tumor(T) stage</b>    |                        |          |
| T1-2                             | 62                     | 55.86    |
| T3-4                             | 49                     | 44.14    |
| <b>Lymph node(N) metastasis</b>  |                        |          |
| N0                               | 23                     | 20.72    |
| N1-3                             | 88                     | 79.28    |
| <b>Clinical stage</b>            |                        |          |
| I-II                             | 25                     | 22.52    |
| III-IVa                          | 86                     | 77.48    |
| <b>Radiotherapeutic response</b> |                        |          |
| Radiosensitive                   | 58                     | 52.25    |
| Radioresistant                   | 53                     | 47.74    |

**Supplementary Table S2. QRT-PCR primers for amplification of miR-23a and IL-8 synthesized by Ribobio**

| No. | Name    | RT primer            | Primer sequence                                                 |
|-----|---------|----------------------|-----------------------------------------------------------------|
| 1   | miR-23a | Cat.#, SSD809230260  | F: Cat.#, SSD809230952<br>R: Cat.#, SSD0892261711               |
| 2   | U6      | Cat.#, SSD0904071008 | F: Cat.#,SSD0904071006<br>R: Cat.#,SSD0904071007                |
| 3   | IL-8    | Oligo dT             | F: 5'-TGGCAGCCTTCCTGATTT-3'<br>R: 5'-AACCTCTGCACCCAGTT-3'       |
| 4   | GAPDH   | Oligo dT             | F: 5'-TGACTTCAACAGCGACACCCA-3'<br>R: 5'-CACCTGTTGCTGTAGCCAAA-3' |
